# Supplementary material for: MetamORF: a repository of unique short open reading frames identified by both experimental and computational approaches for gene and metagene analyses
Source: Oxford University Press journal article supplement (doi:10.1093/database/baab032), 2021-05-17
Supplement: baab032_supp.zip [file baab032_supp.zip]

## Supplementary methods

### ***ORF classification***

- ORF annotations based on length
  - sORF (short ORF): The ORF sequence is shorter than 100 amino acids (stop codon and intron excluded).
- ORF annotations based on the transcript biotype
  - Intergenic: The ORF is located on a 'Long intergenic ncRNA' or 'lincRNA' biotype.
  - ncRNA: The ORF is located on a 'Non coding', 'ncRNA', 'Processed transcript', 'processed\_transcript', 'Long non-coding RNA', 'lncRNA', '3' overlapping ncRNA', 'Macro lncRNA', 'Long intergenic ncRNA', 'lincRNA', 'miRNA', 'miscRNA', 'piRNA', 'rRNA', 'siRNA', 'snRNA', 'snoRNA', 'tRNA', or 'vaultRNA' biotype.
  - Pseudogene: The ORF is located on a 'Pseudogene', 'IG pseudogene', 'Polymorphic pseudogene', 'Processed pseudogene', 'processed\_pseudogene', 'Transcribed pseudogene', 'transcribed\_processed\_pseudogene', 'transcribed\_unprocessed\_pseudogene', 'unprocessed\_pseudogene', 'transcribed\_unitary\_pseudogene', 'Translated pseudogene', 'Unitary pseudogene', 'unitary\_pseudogene' or 'Unprocessed pseudogene' biotype.
  - NMD: The ORF is located on a 'Non sense mediated decay', 'NMD', 'nonsense\_mediated\_decay' or 'non\_stop\_decay' biotype.
  - Readthrough: The ORF is located on a 'Readthrough' or 'Stop codon readthrough' biotype.
- ORF annotations based on the relative position
  - Upstream: The start codon of the ORF is located upstream of the CDS start codon and the stop codon of the ORF is located upstream of the CDS stop codon. Note that if both the start and the stop codons are the same for the ORF than the CDS, then the ORF is annotated CDS instead.
  - Downstream:
    - The start codon of the ORF is located downstream of the CDS start codon and the stop codon of the ORF is located downstream of the CDS stop codon. Note that if both the start and the stop codons are the same for the ORF than the CDS, then the ORF is annotated CDS instead, or
    - The ORF is located on a '3'overlapping ncRNA' biotype.
  - Overlapping:
    - The start codon of the ORF is located upstream of the CDS start codon and the stop codon of the ORF is located downstream of the CDS start codon and upstream of the CDS stop codon, or
    - The start codon of the ORF is located downstream of the CDS start codon and upstream of the CDS stop codon and the stop codon of the ORF is located downstream of the CDS stop codon or
    - The ORF is located on an 'Antisense' biotype.
  - Intronic: The ORF is located on a 'retained\_intron', 'sense\_intronic' or 'sense\_overlapping' biotype.
  - InCDS: The start codon of the ORF is located downstream of the CDS start codon and the stop codon of the ORF is located upstream of the CDS stop codon. Note that if both the start and the stop codons are the same for the ORF than the CDS, then the ORF is annotated CDS instead.
  - CDS: The start codon of the ORF is the same than the CDS start codon and the stop codon of the ORF is the same than the CDS stop codon.
  - NewCDS: The start codon of the ORF is located upstream of the CDS start codon and the stop codon of the ORF is located downstream of the CDS stop codon. Note that if both the start and the stop codons are the same for the ORF than the CDS, then the ORF is annotated CDS instead.
- ORF annotations based on the reading frame
  - Alternative: The ORF start is located on a different frame than the CDS start codon (i.e. the distances in bp between the first nucleotide of the ORF start and the first nucleotide of the CDS start is not a multiple of three).

- ORF annotations based on the strand
  - Opposite: The ORF is located on the opposite strand of its transcript.

**Supp. Table S1 | Data sources description.**

| <b>Publication</b>                         | <b>DOI</b>                   | <b>Database / Source description</b> | <b>Included</b> | <b>Criteria of exclusion if not included</b>            |
|--------------------------------------------|------------------------------|--------------------------------------|-----------------|---------------------------------------------------------|
| Andreev et al., 2018, eLife (1)            | 10.7554/eLife.32563          |                                      | No              | ORF start and stop genomic absolute coordinates missing |
| Rodriguez et al., 2019, BMC Genomics (2)   | 10.1101/412106               |                                      | No              | ORF start and stop genomic absolute coordinates missing |
| Sharipov et al., 2014, Virtual Biology (3) | 10.12704/vb/e18              | RiboSeqDB                            | No              | ORF start and stop genomic absolute coordinates missing |
| Evans et al., 2012, Nat. Methods (4)       | 10.1038/nmeth.2227           | PITDB                                | No              | ORF start and stop genomic absolute coordinates missing |
| Chew et al., 2016, Nat. Commun. (5)        | 10.1038/ncomms11663          |                                      | No              | ORF start and stop genomic absolute coordinates missing |
| Wethmar et al., 2014, Nucl. Ac. Res. (6)   | 10.1093/nar/gkt952           | uORFdb                               | No              | ORF start and stop genomic absolute coordinates missing |
| Fields et al., 2015, Mol. Cell (7)         | 10.1016/j.molcel.2015.11.013 |                                      | No              | Dataset included in sORFs.org                           |
| Liu et al., 2018, Nucl. Ac. Res. (8)       | 10.1093/nar/gkx1034          | TranslatomeDB                        | No              | Automated download of numerous files impossible         |
| Wang et al., 2019, Nucl. Ac. Res. (9)      | 10.1093/nar/gky978           | RPFdb                                | No              | Automated download of numerous files impossible         |

|                                                   |                           |                                                                                                                                                       |     |                                                                                                                                  |
|---------------------------------------------------|---------------------------|-------------------------------------------------------------------------------------------------------------------------------------------------------|-----|----------------------------------------------------------------------------------------------------------------------------------|
| Hao et al., 2018, Brief Bioinform. (10)           | 10.1093/bib/bbx005        | smPROT                                                                                                                                                | No  | ORF theoretical length different from the provided ORF length for more than 95% of the entries, suggesting unregistered splicing |
| Lee et al., 2012, Proc. Natl. Acad. Sci. USA (11) | 10.1073/pnas.1207846109   | TISdb. Files downloaded from “download” section.                                                                                                      | No  | No information provided about the splicing neither about the ORF length                                                          |
| McGillivray et al., 2018, Nucl. Ac. Res. (12)     | 10.1093/nar/gky188        | Supplementary tables S3, S4, S6-S14                                                                                                                   | No  | No information provided about the splicing neither about the ORF length                                                          |
| Mackowiak et al., 2015, Genome Biol. (13)         | 10.1186/s13059-015-0742-x | Additional file 2: Table S1. All sORF information for human                                                                                           | Yes |                                                                                                                                  |
| Erhard et al., 2018, Nat. Meth. (14)              | 10.1038/nmeth.4631        | Supplementary Table 3: Identified ORFs (Union of all ORFs detected either by PRICE, RP-BP or ORF-RATER, or contained in the annotation (Ensembl V75)) | Yes |                                                                                                                                  |
| Johnstone et al., 2016, EMBO (15)                 | 10.15252/embj.201592759   | Dataset EV2: Location and translation data for all analyzed transcripts and ORFs in human                                                             | Yes |                                                                                                                                  |
| Laumont et al., 2016, Nat. Commun. (16)           | 10.1038/ncomms10238       | Supplementary Data 2: List of all cryptic MAPs detected in subject 1. Table presenting the genomic and proteomic features of all cryptic MAPs         | Yes |                                                                                                                                  |

|                                            |                     |                                                                                                                                                                                                                                                                                          |     |
|--------------------------------------------|---------------------|------------------------------------------------------------------------------------------------------------------------------------------------------------------------------------------------------------------------------------------------------------------------------------------|-----|
| Samandi et al., 2017, eLife (17)           | 10.7554/eLife.27860 | <i>Homo sapiens</i> alternative protein predictions based on RefSeq GRCh38 (hg38) based on assembly GCF_000001405.26. Release date 01/01/2016 (tsv file).<br><i>Mus musculus</i> alternative protein predictions based on annotation version GRCm38. Release date 01/01/2016 (tsv file). | Yes |
| Olexiouk et al., 2018, Nucl. Ac. Res. (18) | 10.1093/nar/gkx1130 | sORFs.org. Download full database content from their website                                                                                                                                                                                                                             | Yes |

**Supp. Table S2 | Date of download of the data sources and cross-references**

| File / data source                                       | Date of download |
|----------------------------------------------------------|------------------|
| HGNC cross-references for <i>H. sapiens</i>              | 08/06/2020       |
| NCBI cross-references for <i>M. musculus</i>             | 08/06/2020       |
| sORFs.org - <i>H. sapiens</i>                            | 08/06/2020       |
| Erhard <i>et al.</i> , 2018 - <i>H. sapiens</i> (14)     | 04/01/2019       |
| Johnstone <i>et al.</i> , 2016 - <i>H. sapiens</i> (15)  | 04/01/2019       |
| Laumont <i>et al.</i> , 2016 - <i>H. sapiens</i> (16)    | 04/01/2019       |
| Mackowiak <i>et al.</i> , 2015 - <i>H. sapiens</i> (13)  | 20/03/2019       |
| Samandi <i>et al.</i> , 2017 - <i>H. sapiens</i> (17)    | 04/01/2019       |
| Johnstone <i>et al.</i> , 2016 - <i>M. musculus</i> (15) | 04/01/2019       |
| sORFs.org - <i>M. musculus</i>                           | 08/06/2020       |
| Mackowiak <i>et al.</i> , 2015 - <i>M. musculus</i> (13) | 20/03/2019       |
| Samandi <i>et al.</i> , 2017 - <i>M. musculus</i> (17)   | 04/01/2019       |

**Supp. Table S3 | Homogenization of cell types**

| <b>Species</b>    | <b>Name of the original cell type<br/>(as provided by the data source)</b> | <b>Cell type name<br/>used in MetamORF</b> |
|-------------------|----------------------------------------------------------------------------|--------------------------------------------|
| <i>H. sapiens</i> | loayza_puch_2013                                                           | BJ                                         |
|                   | rooijers_2013                                                              |                                            |
|                   | ji_BJ_2015                                                                 |                                            |
|                   | B cells                                                                    | B_cell                                     |
|                   | mills_2016                                                                 | Blood                                      |
|                   | gonzalez_2014                                                              | Brain                                      |
|                   | Human brain tumor                                                          | Brain_tumor                                |
|                   | ji_breast_2015                                                             | Breast                                     |
|                   | loayza_puch_2016                                                           | Breast_tumor                               |
|                   | jakobsson_2017                                                             | HAP1                                       |
|                   | crappe_2014                                                                | HCT116                                     |
|                   | lee_2012                                                                   | HEK293                                     |
|                   | andreev_2015                                                               |                                            |
|                   | sidrauski_2015                                                             |                                            |
|                   | liu_2013_HEK                                                               |                                            |
|                   | liu_HEK_2013                                                               |                                            |
|                   | ingolia_2012                                                               |                                            |
|                   | ingolia_2014                                                               |                                            |
|                   | calviello_2016                                                             |                                            |
|                   | iwasaki_2016                                                               |                                            |
|                   | park_2017                                                                  |                                            |
|                   | zhang_2017                                                                 |                                            |
|                   | eichorn_2014                                                               | HEK293T                                    |
|                   | jan_2014                                                                   |                                            |
|                   | Primary human foreskin fibroblasts<br>(HFFs)                               | HFF                                        |
|                   | Primary human fibroblast (HFF)                                             |                                            |
|                   | rutkowski_2015                                                             | HeLa                                       |
|                   | wang_2015                                                                  |                                            |
|                   | niu_2014                                                                   |                                            |
|                   | yoon_2014                                                                  |                                            |
|                   | liu_2013_HeLa                                                              |                                            |
|                   | liu_Hela_2013                                                              |                                            |
|                   | stumpf_2013                                                                |                                            |

|                        |                                   |                  |
|------------------------|-----------------------------------|------------------|
|                        | park_2016                         |                  |
|                        | zur_2016                          |                  |
|                        | shi_2017                          |                  |
|                        | werner_2015                       |                  |
|                        | xu_2016                           | hES              |
|                        | gawron_2016                       | Jurkat           |
|                        | cenik_2015                        | LCL              |
|                        | Loayza_Puch_2016                  | MCF7             |
|                        | rubio_2014                        | MDA-MB-231       |
|                        | wiita_2013                        | MM1S             |
|                        | su_2015                           | Monocyte         |
|                        | grow_2015                         | NCCIT            |
|                        | tanenbaum_2015                    |                  |
|                        | tirosh_2015                       | RPE-1            |
|                        | wein_2014                         | Skeletal_muscle  |
|                        | fritsch_2012                      |                  |
|                        | stern_ginossar_2012               | THP-1            |
|                        | elkon_2015                        | U2OS             |
|                        | malecki_2017                      | Flp-In_T-REx-293 |
| <i>M.<br/>musculus</i> | eichorn_3t3_2014                  | 3T3              |
|                        | jovanovic_2015                    |                  |
|                        | fields_2015                       | BMDC             |
|                        | eichorn_bcell_2014                | B_cell           |
|                        | gonzalez_2014_mmu                 |                  |
|                        | cho_2015                          | Brain            |
|                        | laguesse_2015                     |                  |
|                        | deklerck_2015                     | C2C12            |
|                        | ingolia_2014_mmu                  |                  |
|                        | Ingolia_2011                      | E14              |
|                        | ingolia_2011                      |                  |
|                        | Mouse gliomal cells               | Glioma           |
|                        | Mouse liver cell                  |                  |
|                        | eichorn_liver_2014                |                  |
|                        | gao_liver_2014                    | Liver            |
|                        | gerashchenko_2016                 |                  |
|                        | janich_2015                       |                  |
|                        | Mouse Embryonic Fibroblast (MEFs) |                  |
|                        | thoreen_2012                      | MEF              |
|                        | lee_2012_mmu                      |                  |

---

gao\_mef\_2014

---

reid\_er\_2016

---

reid\_cytosol\_2016

---

reid\_2014

---

Mouse Embryonic Stem Cells

MESC

---

katz\_2014

NSC

---

guo\_2010\_mmu

Neutrophil

---

you\_2015

R1E

---

blanco\_2016

Skin\_tumor

---

diaz\_munoz\_2015

Spleen\_B\_cell

---

castaneda\_2014

Testis

---

hurt\_2013

v6-5

---

Supp. Table S4 | MetamORF cell types and ontologies

| MetamORF<br>cell type | Ontology terms* |               |             |               |           |               |             |               |               |              |
|-----------------------|-----------------|---------------|-------------|---------------|-----------|---------------|-------------|---------------|---------------|--------------|
|                       | CL              | CLO           | BTO         | HCAO          | FMA       | OBI           | NCIT        | EFO           | BAO           | OMIT         |
| HCT116                |                 |               | BTO:0001109 |               |           |               |             | EFO:0002824   | CLO:0003665   | OMIT:0023581 |
| THP-1                 |                 |               | BTO:0001370 |               |           |               |             | EFO:0001253   | CLO:0009348   |              |
| HEK293                |                 | CLO:0001230   | BTO:0000007 |               |           |               |             | EFO:0001182   |               | OMIT:0027010 |
| NCCIT                 |                 | CLO:0007955   | BTO:0004180 |               |           |               |             |               |               |              |
| HeLa                  |                 |               | BTO:0000567 |               |           |               | NCIT:C20226 | EFO:0001185   | CLO:0003684   | OMIT:0007538 |
| HEK293T               |                 |               | BTO:0002181 |               |           |               |             | EFO:0001184   |               |              |
| Brain                 | UBERON:000955   | UBERON:000955 | BTO:0000142 | UBERON:000955 | FMA:50801 | UBERON:000955 | NCIT:C12439 | UBERON:000955 | UBERON:000955 | OMIT:0003277 |
| HFF                   | CL:1001608      | CLO:0000556   | BTO:0002245 |               |           |               |             |               |               |              |
| MDA-MB-231            |                 |               | BTO:0000815 |               |           |               |             | EFO:0001209   | CLO:0007634   |              |
| BJ                    |                 | CLO:0001980   | BTO:0003807 |               |           |               |             | EFO:0002779   | BAO:0002670   |              |
| MM1S                  |                 | CLO:0037203   |             |               |           |               |             | EFO:0005724   |               |              |
| U2OS                  |                 |               | BTO:0001938 |               |           |               |             | EFO:0002869   | CLO:0009454   |              |
| Jurkat                |                 | BTO:0000661   | BTO:0000661 |               |           | OBI:1110035   |             | EFO:0002796   | CLO:0007043   | OMIT:0019249 |
| RPE-1                 | CL:0002586      | BTO:0002334   |             |               |           |               | NCIT:C33470 |               |               |              |
| Skeletal_muscle       | CL:0000188      |               | BTO:0004392 |               |           |               | NCIT:C48687 |               |               |              |
| hES                   |                 | CLO:0037280   | BTO:0001581 |               |           |               |             |               |               | OMIT:0001087 |
| Neutrophil            | CL:0000775      |               | BTO:0000130 |               |           |               | NCIT:C12533 |               |               |              |
| v6-5                  |                 |               |             |               |           |               |             | EFO:0006308   |               |              |
| E14                   |                 |               | BTO:0005136 |               |           |               |             | EFO:0007075   |               |              |
| NSC                   | CL:0000047      | CLO:0000051   |             |               |           |               |             |               |               |              |
| MEF                   | CL:2000042      |               | BTO:0002572 |               |           |               | NCIT:C24196 | EFO:0004040   |               |              |

|                  |                |                |             |                |           |                |              |                |                |              |
|------------------|----------------|----------------|-------------|----------------|-----------|----------------|--------------|----------------|----------------|--------------|
| Spleen_B_cell    | CL:0000236     |                | BTO:0000776 |                |           | NCIT:C12474    |              |                | OMIT:0016721   |              |
| 3T3              |                | CLO:0001345    |             |                |           |                |              |                | OMIT:0016968   |              |
| B_cell           | CL:0000236     |                | BTO:0000776 | CL:0000236     |           | NCIT:C12474    |              |                | OMIT:0002778   |              |
| Liver            |                | EFO:0000887    | BTO:0000759 | UBERON:0002107 | FMA:63179 | UBERON:0002107 | NCIT:C12392  | UBERON:0002107 | UBERON:0002107 | OMIT:0009182 |
| BMDc             |                |                | BTO:0003857 |                |           |                | NCIT:C156591 |                |                |              |
| Skin_tumor       |                |                |             |                |           |                |              | DOID:3178      |                |              |
| Testis           | UBERON:0000473 | UBERON:0000473 | BTO:0001363 | UBERON:0000473 | FMA:7210  | UBERON:0000473 | NCIT:C12412  | EFO:0000984    | UBERON:0000473 | OMIT:0014592 |
| C2C12            |                |                | BTO:0000165 |                |           |                |              | EFO:0001098    | BAO:0002708    |              |
| R1E              |                | CLO:0008700    | BTO:0004500 |                |           |                |              | EFO:0002076    |                |              |
| HAP1             |                |                |             |                |           |                |              | EFO:0007598    | OMIT:0037111   |              |
| Blood            | CL:0000081     | EFO:0000296    | BTO:0000089 | CL:0000081     | FMA:62844 | UBERON:0000178 |              | CL:0000081     | UBERON:0000178 | OMIT:0003133 |
| Monocyte         | CL:0000576     | CL:0000576     | BTO:0000876 | CL:0000576     | FMA:62864 |                | NCIT:C12547  | CL:0000576     |                |              |
| LCL              |                |                | BTO:0003335 |                |           |                |              | EFO:0005292    |                |              |
| MCF7             |                |                | BTO:0000093 |                |           |                | NCIT:C18096  | EFO:0001203    | CLO:0007606    | OMIT:0028025 |
| MCF10A           |                | CLO:0007599    | BTO:0001939 |                |           |                |              | EFO:0001200    |                |              |
| Flp-In_T-REx-293 |                | CLO:0037238    | BTO:0006149 |                |           |                |              |                |                |              |
| Brain_tumor      |                | DOID:1319      | BTO:0001573 |                |           |                | NCIT:C2907   | MONDO:0001657  | DOID:1319      | OMIT:0003288 |
| MESC             | CL:0002322     | CLO:0037317    | BTO:0001581 |                | FMA:82841 |                | NCIT:C12935  | EFO:0004038    |                | OMIT:0001088 |
| Glioma           |                | EFO:0000520    | BTO:0000526 |                |           |                | NCIT:C3059   | EFO:0005543    | DOID:0060108   | OMIT:0007103 |
| Breast           | UBERON:0000310 | UBERON:0000310 | BTO:0000149 | UBERON:0000310 | FMA:19898 | UBERON:0000310 | NCIT:C12971  | UBERON:0000310 | UBERON:0000310 | OMIT:0003296 |

\* Some ontology terms may refer themselves to external ontologies

**Supp. Table S5 | Kozak contexts definitions.** The start codon contains the nucleotides +1 to +3. The same patterns with variation allowed on the nucleotides between +1 to +3 position were used to compute the Kozak contexts of sORFs with alternative start codons.

|          | -6 | -5 | -4 | -3 | -2 | -1 | +1 | +2 | +3 | +4        |
|----------|----|----|----|----|----|----|----|----|----|-----------|
| Optimal  | G  | C  | C  | R  | C  | C  | A  | T  | G  | G         |
| Strong   | N  | N  | N  | R  | N  | N  | A  | T  | G  | G         |
| Moderate | N  | N  | N  | R  | N  | N  | A  | T  | G  | A / T / C |
| or       | N  | N  | N  | Y  | N  | N  | A  | T  | G  | G         |
| Weak     | N  | N  | N  | Y  | N  | N  | A  | T  | G  | A / T / C |

R = A / G (purine), Y = C / T (pyrimidine)

**Supp. Table S6 | Regular expressions corresponding to Kozak contexts.** The Kozak contexts have been computed using the criteria described in the Supp. table S2. To perform this computation, regular expressions have been searched in the sequences flanking the ORF start codons.

| Kozak context | Regular expression                        |
|---------------|-------------------------------------------|
| Optimal       | GCC[AG]CC.{3}G                            |
| Strong        | .{3}[AG].{2}.{3}G                         |
| Moderate      | (.{3}[AG].{2}.{3}[ATC] .{3}[CT].{2}.{3}G) |
| Weak          | .{3}[CT].{2}.{3}[ACT]                     |

**Supp. Table S7 | Source of the gene lists used to perform the enrichment analysis**

| Gene list                                      | Source                                     | Description                                                                                                                                                                                                        |
|------------------------------------------------|--------------------------------------------|--------------------------------------------------------------------------------------------------------------------------------------------------------------------------------------------------------------------|
| ATF4 targets <sup>1</sup>                      | Han <i>et al.</i> , 2013, Nat. Cell. Biol. | Table S1: "Supplementary Table S2. List of ATF4 and CHOP target genes that have binding peaks within 3kb from TSS of annotated gene." restricted to ATF4 targets (i.e. genes with "Overlap=Common" or "ATF4_Only") |
| CHOP targets <sup>2</sup>                      | Han <i>et al.</i> , 2013, Nat. Cell. Biol. | Table S1: "Supplementary Table S2. List of ATF4 and CHOP target genes that have binding peaks within 3kb from TSS of annotated gene." restricted to ATF4 targets (i.e. genes with "Overlap=Common" or "CHOP_Only") |
| Genes congruently up-regulated <sup>3</sup>    | Guan <i>et al.</i> , 2017, Mol. Cell.      | Get upon request - Congruent (Transcriptional and translational) up-regulation at 16h (chronic ER stress)                                                                                                          |
| Genes transitionally up-regulated <sup>4</sup> | Guan <i>et al.</i> , 2017, Mol. Cell.      | Get on request - Translational up-regulation at 1h (accute ER stress)                                                                                                                                              |

|          |                           |                                                                                                                                                                                                                                                               |
|----------|---------------------------|---------------------------------------------------------------------------------------------------------------------------------------------------------------------------------------------------------------------------------------------------------------|
| Universe | Gene ontology / gProfiler | All protein coding genes with at least one gene ontology annotation have been included in the universe. The lists of GO terms associated with their Ensembl gene IDs have been downloaded using the gProfiler web interface as a gmt file (data sources tab). |
|----------|---------------------------|---------------------------------------------------------------------------------------------------------------------------------------------------------------------------------------------------------------------------------------------------------------|

## Supp. Table S8 | Comparison of MetamORF with existing sORF-related databases

### REFERENCES

1. Andreev,D.E., Arnold,M., Kiniry,S.J., Loughran,G., Michel,A.M., Rachinskii,D. and Baranov,P.V. (2018) TASEP modelling provides a parsimonious explanation for the ability of a single uORF to derepress translation during the integrated stress response. *eLife*, **7**.
2. Rodriguez,C.M., Chun,S.Y., Mills,R.E. and Todd,P.K. (2019) Translation of upstream open reading frames in a model of neuronal differentiation. *BMC Genomics*, **20**, 391.
3. Sharipov,R.N., Yevshin,I.S., Kondrakhin,Y.V. and Volkova,O.A. (2014) RiboSeqDB – a repository of selected human and mouse ribosome footprint and RNA-seq data. *Virtual Biology*, **1**, 37-46–46.
4. Evans,V.C., Barker,G., Heesom,K.J., Fan,J., Bessant,C. and Matthews,D.A. (2012) De novo derivation of proteomes from transcriptomes for transcript and protein identification. *Nat. Methods*, **9**, 1207–1211.
5. Chew,G.-L., Pauli,A. and Schier,A.F. (2016) Conservation of uORF repressiveness and sequence features in mouse, human and zebrafish. *Nat. Commun.*, **7**, 11663.
6. Wethmar,K., Barbosa-Silva,A., Andrade-Navarro,M.A. and Leutz,A. (2014) uORFdb--a comprehensive literature database on eukaryotic uORF biology. *Nucleic Acids Res.*, **42**, D60-67.
7. Fields,A.P., Rodriguez,E.H., Jovanovic,M., Stern-Ginossar,N., Haas,B.J., Mertins,P., Raychowdhury,R., Hacohen,N., Carr,S.A., Ingolia,N.T., *et al.* (2015) A regression-based analysis of ribosome-profiling data reveals a conserved complexity to mammalian translation. *Mol. Cell.*, **60**, 816–827.
8. Liu,W., Xiang,L., Zheng,T., Jin,J. and Zhang,G. (2018) TranslatomeDB: a comprehensive database and cloud-based analysis platform for translatome sequencing data. *Nucleic Acids Res.*, **46**, D206–D212.
9. Wang,H., Yang,L., Wang,Y., Chen,L., Li,H. and Xie,Z. (2019) RPFdb v2.0: an updated database for genome-wide information of translated mRNA generated from ribosome profiling. *Nucleic Acids Res.*, **47**, D230–D234.
10. Hao,Y., Zhang,L., Niu,Y., Cai,T., Luo,J., He,S., Zhang,B., Zhang,D., Qin,Y., Yang,F., *et al.* (2018) SmProt: a database of small proteins encoded by annotated coding and non-coding RNA loci. *Brief. Bioinform.*, **19**, 636–643.

11. Lee,S., Liu,B., Lee,S., Huang,S.-X., Shen,B. and Qian,S.-B. (2012) Global mapping of translation initiation sites in mammalian cells at single-nucleotide resolution. *Proc. Natl. Acad. Sci. U.S.A.*, **109**, E2424-2432.
12. McGillivray,P., Ault,R., Pawashe,M., Kitchen,R., Balasubramanian,S. and Gerstein,M. (2018) A comprehensive catalog of predicted functional upstream open reading frames in humans. *Nucleic Acids Res.*, **46**, 3326–3338.
13. Mackowiak,S.D., Zauber,H., Bielow,C., Thiel,D., Kutz,K., Calviello,L., Mastrobuoni,G., Rajewsky,N., Kempa,S., Selbach,M., *et al.* (2015) Extensive identification and analysis of conserved small ORFs in animals. *Genome Biol.*, **16**.
14. Erhard,F., Halenius,A., Zimmermann,C., L'Hernault,A., Kowalewski,D.J., Weekes,M.P., Stevanovic,S., Zimmer,R. and Dölken,L. (2018) Improved Ribo-seq enables identification of cryptic translation events. *Nat. Methods*, **15**, 363–366.
15. Johnstone,T.G., Bazzini,A.A. and Giraldez,A.J. (2016) Upstream ORFs are prevalent translational repressors in vertebrates. *EMBO J.*, **35**, 706–723.
16. Laumont,C.M., Daouda,T., Laverdure,J.-P., Bonneil,É., Caron-Lizotte,O., Hardy,M.-P., Granados,D.P., Durette,C., Lemieux,S., Thibault,P., *et al.* (2016) Global proteogenomic analysis of human MHC class I-associated peptides derived from non-canonical reading frames. *Nat. Commun.*, **7**, 10238.
17. Samandi,S., Roy,A.V., Delcourt,V., Lucier,J.-F., Gagnon,J., Beaudoin,M.C., Vanderperre,B., Breton,M.-A., Motard,J., Jacques,J.-F., *et al.* (2017) Deep transcriptome annotation enables the discovery and functional characterization of cryptic small proteins. *eLife*, **6**.
18. Olexiouk,V., Van Criekinge,W. and Menschaert,G. (2018) An update on sORFs.org: a repository of small ORFs identified by ribosome profiling. *Nucleic Acids Res.*, **46**, D497–D502.

**A** *H. sapiens*

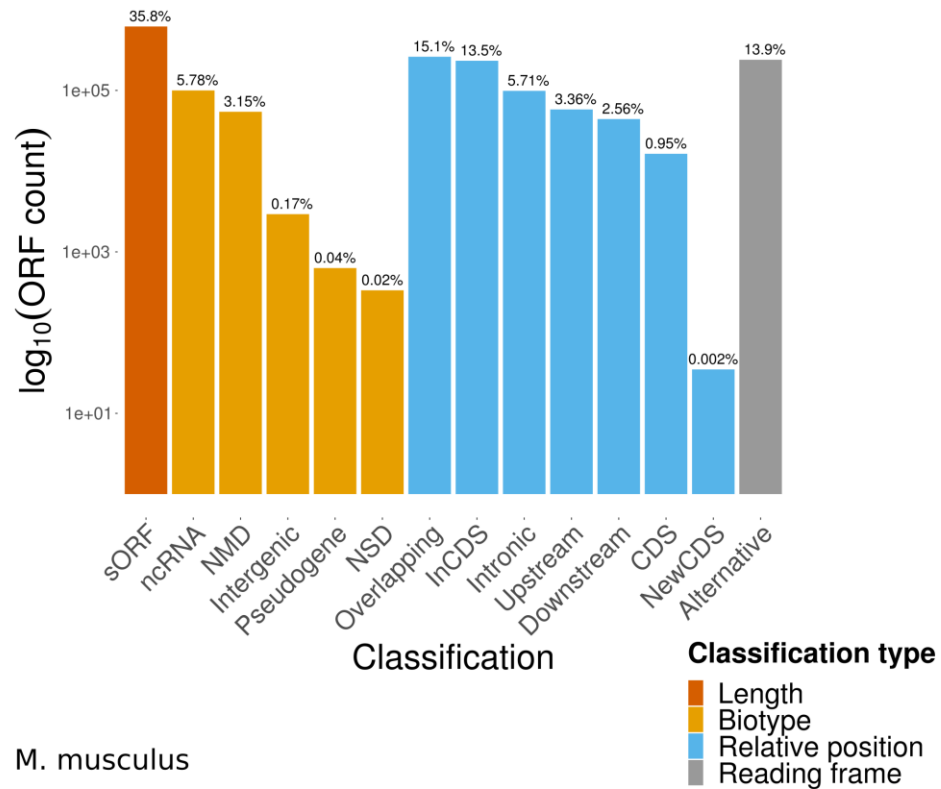

**B** *M. musculus*

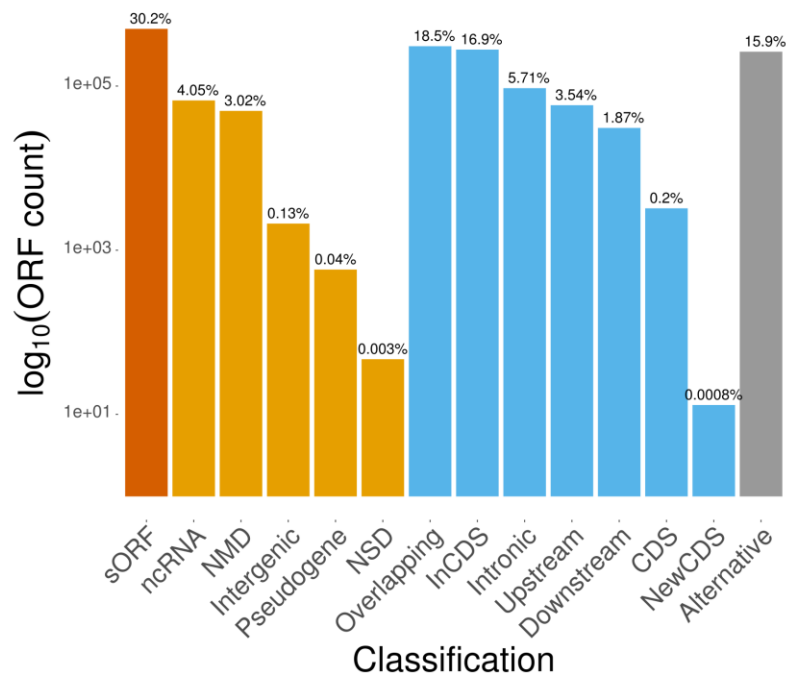

**Supp. Figure S1 | Count of ORFs in each class.** The barplot represent the count of ORFs annotated for each class for (A) *H. sapiens* and (B) *M. musculus*. The percentages displayed over the bars indicates the proportion of ORFs annotated in the class over the total number of annotations computed by the MetamORF workflow for the species.

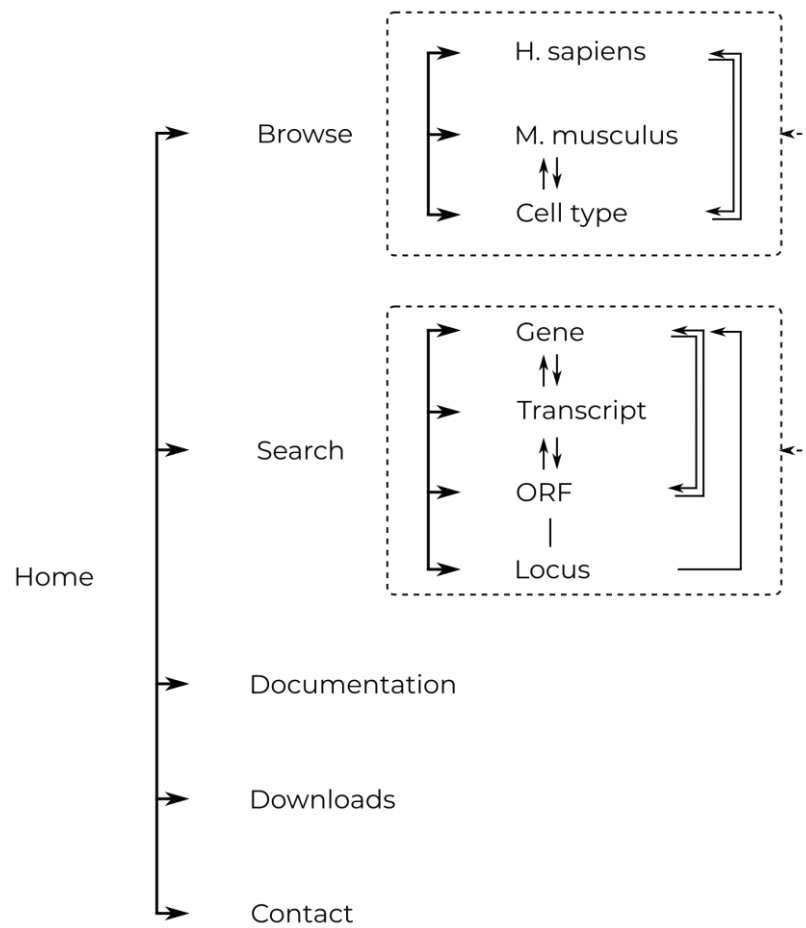

**Supp. Figure S2 | Relational map of MetamORF web interface.**
